# Supplementary material for: Aquaporin OsPIP2;2 links the H2O2 signal and a membrane-anchored transcription factor to promote plant defense
Source: PubMed Central journal article supplement — Plant Physiol. 2021 Dec 27;188(4):2325–41. doi: 10.1093/plphys/kiab604 (PMC8968290; doi:10.1093/plphys/kiab604), 2021-12-27
Supplement: kiab604_supplementary_data.pdf [file kiab604_supplementary_data.pdf]

---

**Aquaporin OsPIP2;2 Links the H<sub>2</sub>O<sub>2</sub> Signal and a Membrane-anchored Transcription Factor to Promote Plant Defense**

Mou Zhang,<sup>1</sup> Haotian Shi,<sup>1</sup> Ningning Li,<sup>1</sup> Nana Wei,<sup>1</sup> Yan Tian,<sup>1</sup> Jinfeng Peng,<sup>1</sup> Xiaochen Chen,<sup>1</sup> Liyuan Zhang,<sup>2,3</sup> Meixiang Zhang<sup>1,\*†</sup> and Hansong Dong<sup>1,2,3,\*†</sup>

<sup>1</sup>Department of Plant Pathology, Nanjing Agricultural University, Nanjing, China.

<sup>2</sup> National Key Laboratory of Crop Biology, Shandong Agricultural University, Taian, China.

<sup>3</sup>Department of Plant Pathology, Shandong Agricultural University, Taian, China.

\* Author for communication: [hsdong@njau.edu.cn](mailto:hsdong@njau.edu.cn) (H.S.D.)

†Joint Senior authors: Meixiang Zhang and Hansong Dong

## Supplemental Materials

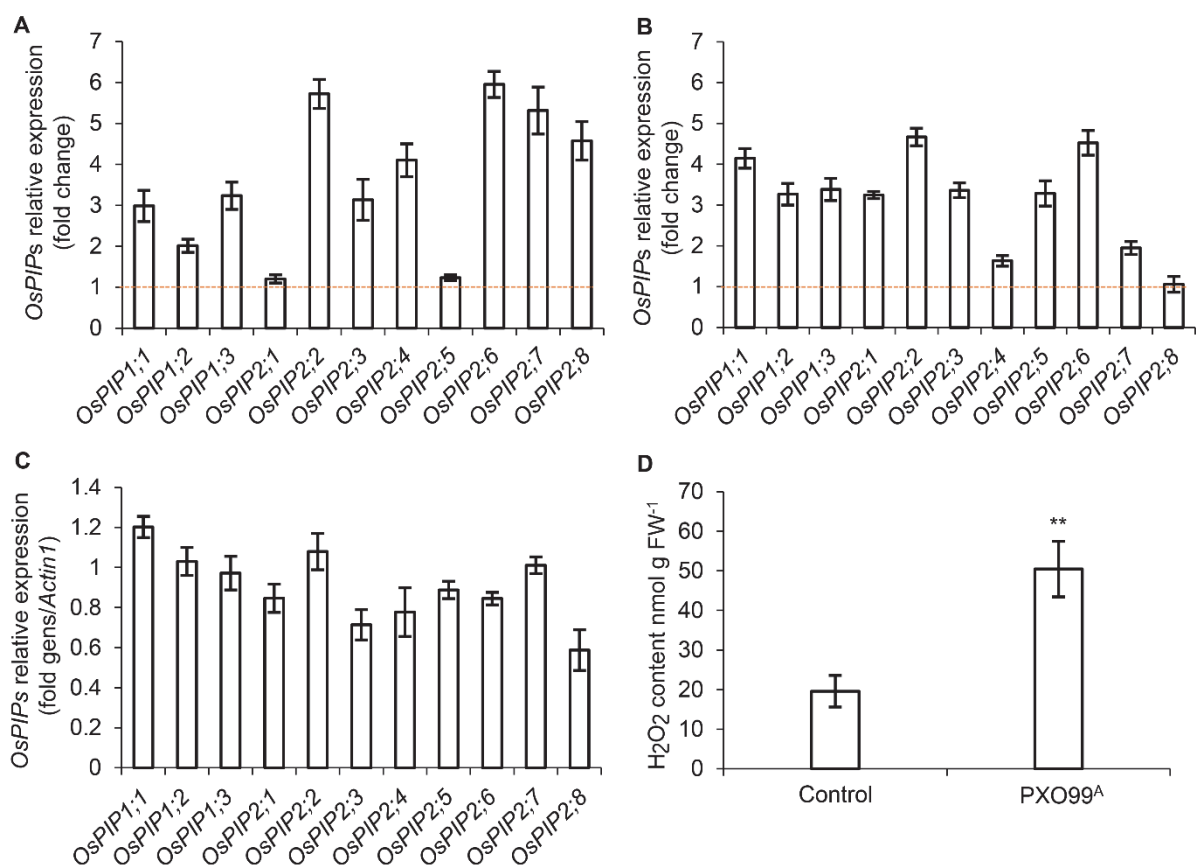

**Figure S1. The expression profiles of *OsPIPs* in response to PXO99<sup>A</sup>.** A, Relative expression of *OsPIPs* after PXO99<sup>A</sup> inoculation. The rice leaves were inoculated with PXO99<sup>A</sup> (OD<sub>600</sub> = 0.6). Eight hours later, total RNA was extracted for RT-qPCR analysis. B, Relative expression of *OsPIPs* upon H<sub>2</sub>O<sub>2</sub> treatment. The leaves were treated with 2 mM H<sub>2</sub>O<sub>2</sub>. Two hours later, gene expression was analyzed by RT-qPCR and expression level of each gene was shown as the ratio of transcript quantities between treatment and control plants. C, Relative expression of *OsPIPs* to *OsActin1* in normal growth condition. D, H<sub>2</sub>O<sub>2</sub> content in 2-week-old rice leaves 8 h after inoculation with PXO99<sup>A</sup>. FW, fresh weight. Data are shown as means ± SEM ( $n = 4$ ). Asterisks indicate significant differences compare with control by Student's  $t$  test (\*\*  $P \leq 0.01$ ). These experiments were performed at least twice with similar results.

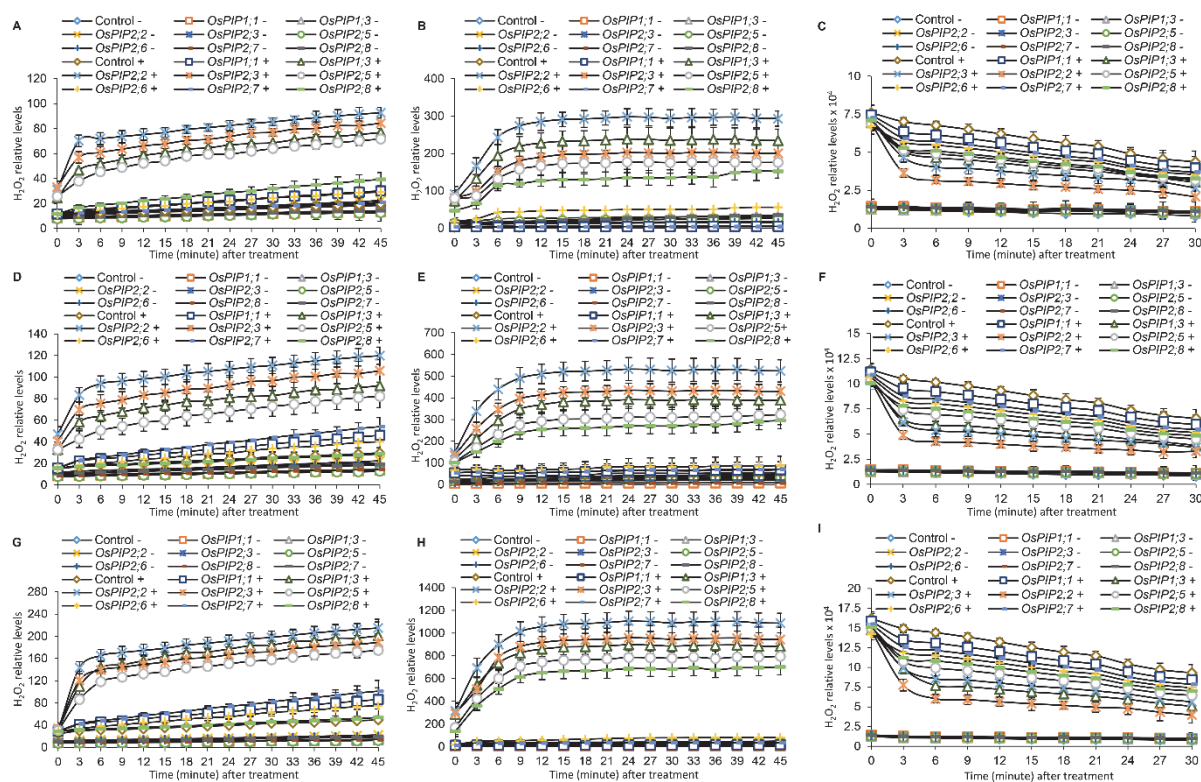

**Figure S2. H<sub>2</sub>O<sub>2</sub> transport mediated by OsPIPs in yeast.** A-C, Chronological changes of H<sub>2</sub>O<sub>2</sub> content in yeast cells after treatment with 0 or 300  $\mu$ M H<sub>2</sub>O<sub>2</sub> detected by 2',7'-dichlorofluorescein diacetate (H<sub>2</sub>DCF-DA), Amplex Red (AR), and Amplex Ultra Red (AUR) probes respectively. D-F, Chronological changes of H<sub>2</sub>O<sub>2</sub> content in yeast cells after treatment with 0 or 500  $\mu$ M H<sub>2</sub>O<sub>2</sub> detected by H<sub>2</sub>DCF-DA, AR, and AUR probes respectively. G-I, Chronological changes of H<sub>2</sub>O<sub>2</sub> content in yeast cells after treatment with 0 or 1000  $\mu$ M H<sub>2</sub>O<sub>2</sub> detected by H<sub>2</sub>DCF-DA, AR, and AUR probes respectively. + indicates supplied with H<sub>2</sub>O<sub>2</sub>, - indicates supplied with H<sub>2</sub>O as control. Data are shown as means  $\pm$  SEM ( $n = 8$ ). These experiments were performed at least twice with similar results.

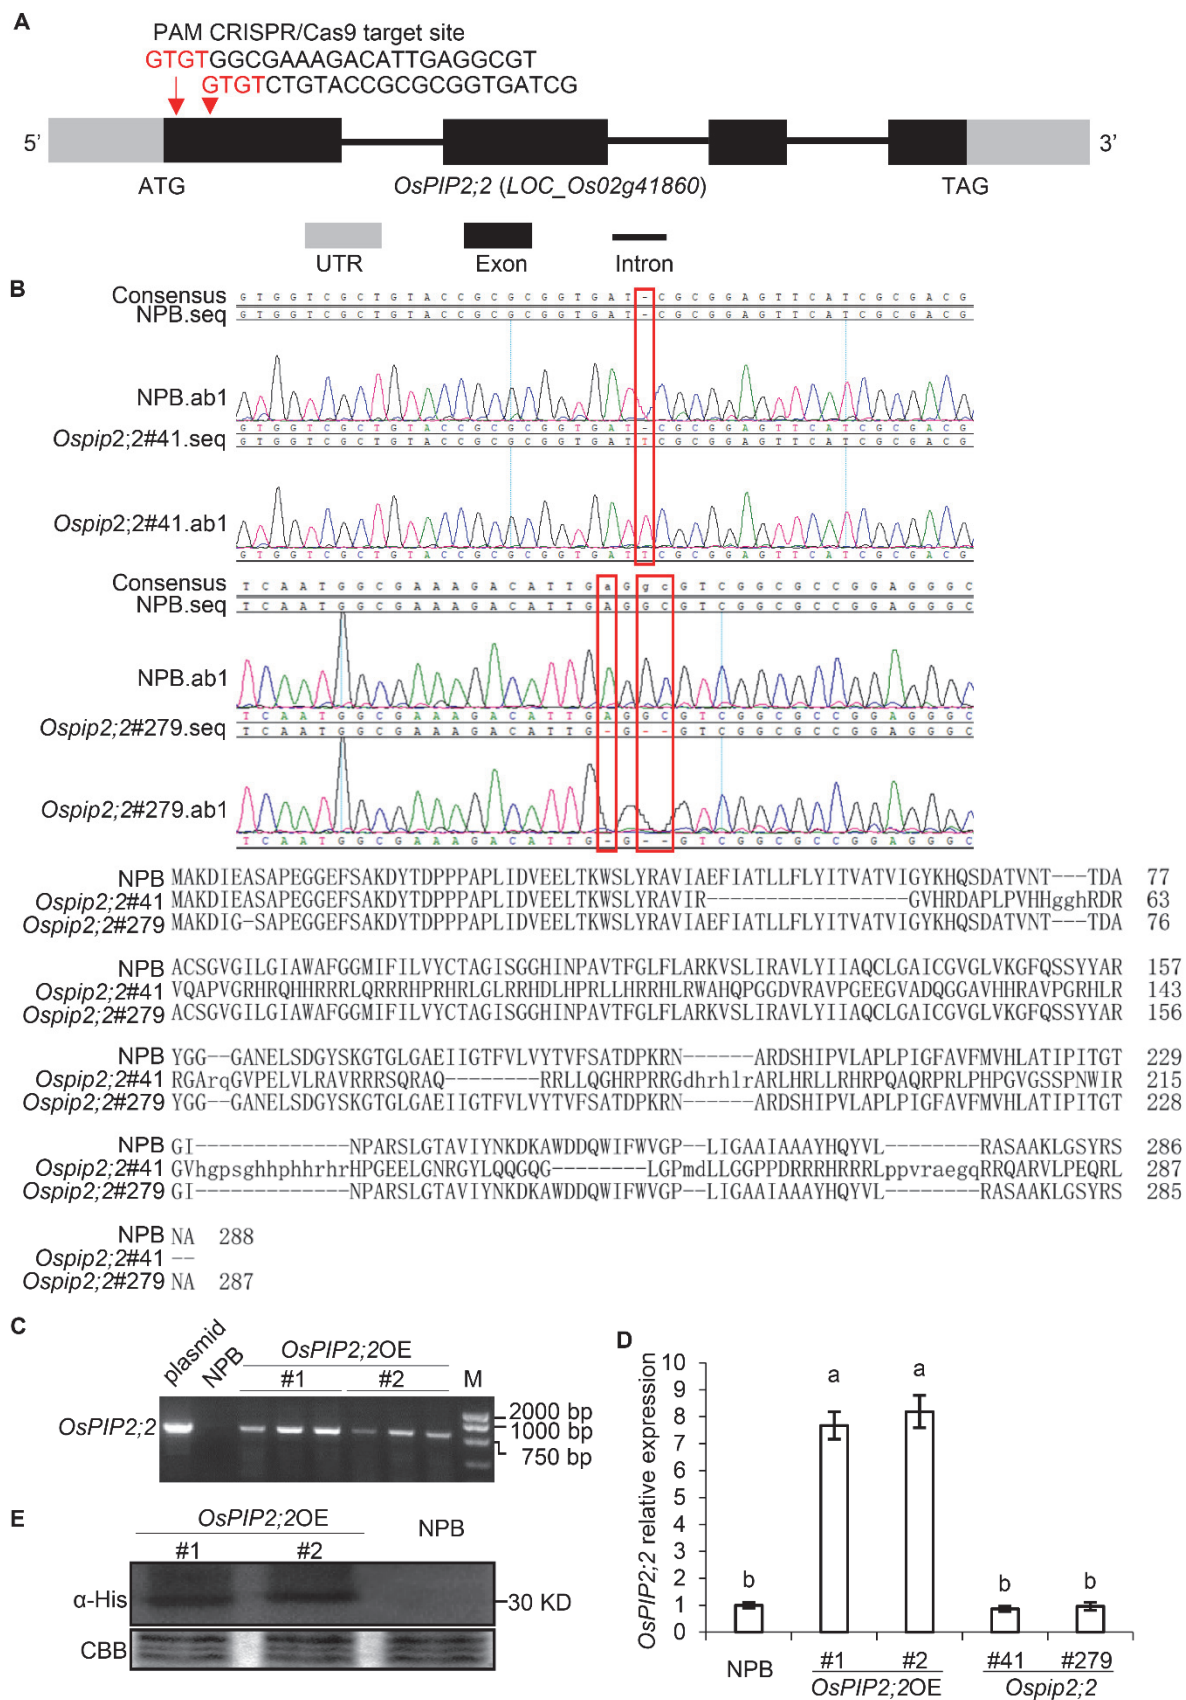

**Figure S3. Confirmation of the *OsPIP2;2* mutation and overexpression lines. A,** Schematic presentation of the *OsPIP2;2* structure and gene editing sites. PAM, Protospacer

---

adjacent motif. Red arrows were used to show editing sites in *OsPIP2;2*. B, Sanger sequencing chromatograph of the target sites in *OsPIP2;2* and amino acid sequence alignment between *OsPIP2;2* and the mutant lines. The red boxes were used to show mutation sites in *OsPIP2;2*. C, Confirmation of the *OsPIP2;2* overexpression lines by genomic PCR. M, DL2000 DNA marker. Plasmid, the pCAMBIA1301-*OsPIP2;2*-His plasmid as a positive control. D, Relative expression of *OsPIP2;2* in NPB, *OsPIP2;2*OE and *Ospip2;2* lines. Expression level of *OsPIP2;2* was shown as the ratio of transcript quantities between transgenic and NPB plants. Data are shown as means  $\pm$  SEM ( $n = 4$ ). NPB, Wild-type Nipponbare. Lowercase letters indicate significant differences at  $P \leq 0.01$  followed Duncan's multiple range tests and one-way ANOVA. The experiment was performed twice with similar results. E, Detection of *OsPIP2;2* protein expression by western blotting. The *OsPIP2;2* protein was detected by His antibody, and coomassie brilliant blue (CBB) staining was used to show protein loading (bottom panel).

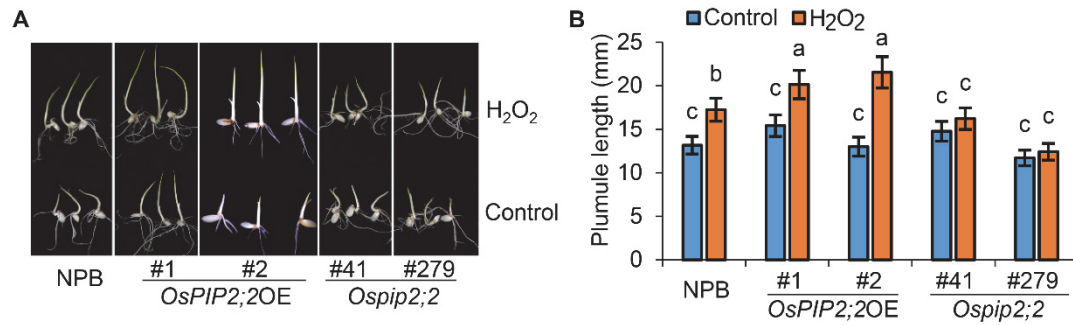

1

2 **Figure S4. Contribution of OsPIP2;2 in H<sub>2</sub>O<sub>2</sub>-mediated cell elongation.** A, Wild-type  
 3 Nipponbare (NPB), *OsPIP2;2OE*, and *Ospip2;2* seedlings were grown on 1/2 MS medium  
 4 containing 0.5 mM H<sub>2</sub>O<sub>2</sub> at 28°C for 7 days. Data are shown as means ± SEM ( $n = 10$ ). B,  
 5 Quantification of plumule lengths after H<sub>2</sub>O<sub>2</sub> treatment. Lowercase letters indicate significant  
 6 differences at  $P \leq 0.01$  followed Duncan's multiple range tests and one-way ANOVA. The  
 7 experiment was performed at least twice with similar results.

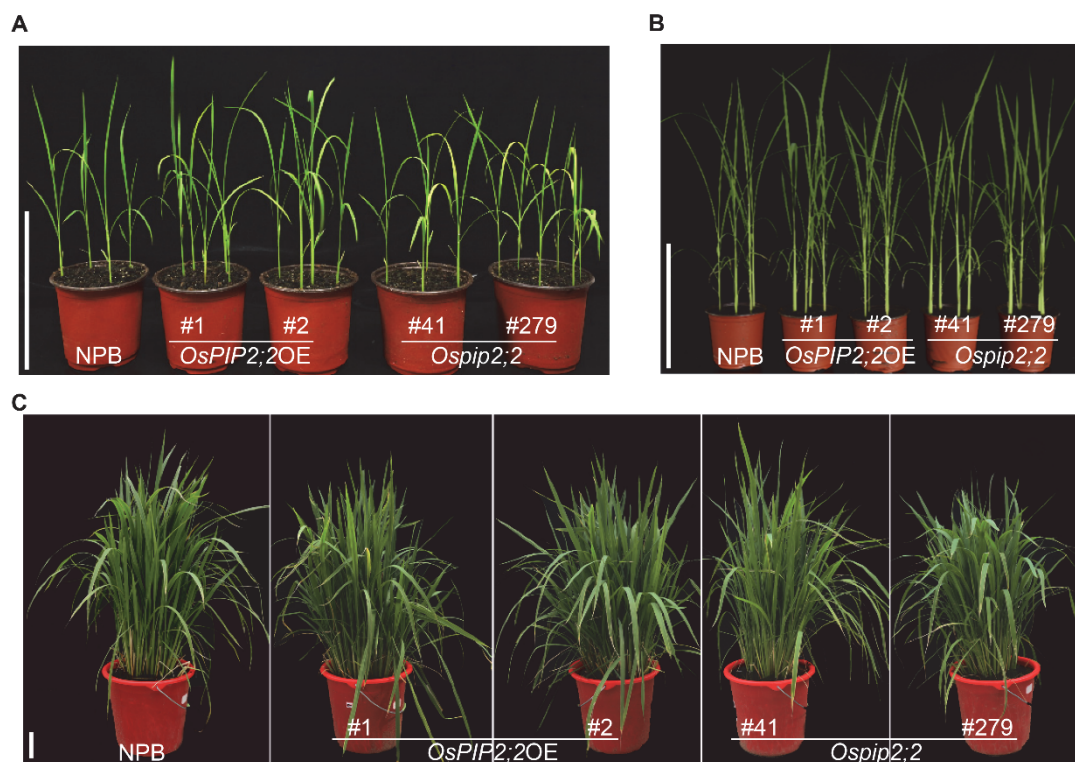

8

9 **Figure S5. Growth and development of transgenic lines in the greenhouse.** A, Fifteen-  
10 day-old rice seedlings. B, One-month-old seedlings. C, Three-month-old rice plants. Scale  
11 bar, 10 cm.

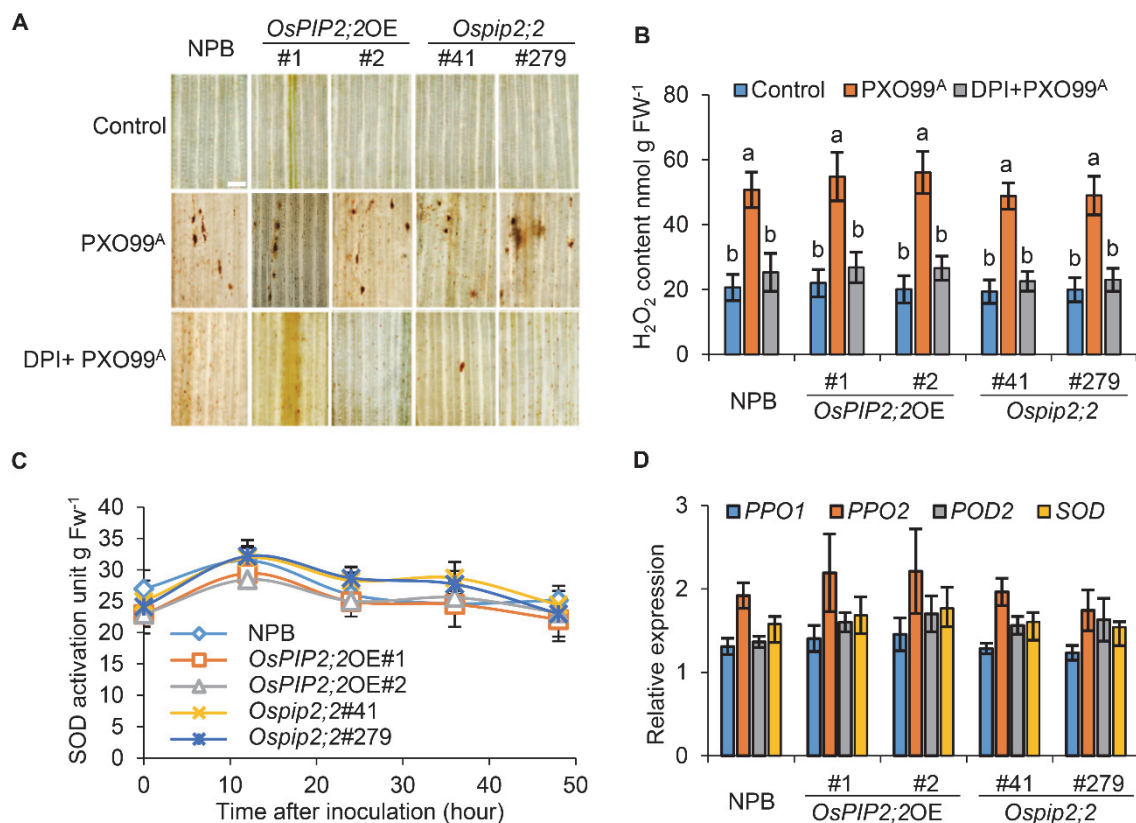

12

13 **Figure S6. Analysis of the H<sub>2</sub>O<sub>2</sub> content in rice after infection with PXO99<sup>A</sup>.** A, 3,3-  
 14 diaminobenzidine (DAB) staining of H<sub>2</sub>O<sub>2</sub> production in NPB, *OsPIP2;2OE*, and *Ospip2;2*  
 15 plants at 24 h after inoculation with PXO99<sup>A</sup>. Scale bar = 50 μm, applying to all the images.  
 16 B, Total H<sub>2</sub>O<sub>2</sub> content in rice 8 h post inoculation with PXO99<sup>A</sup>. Leaf tissues were ground  
 17 into powder, and mixed with 20 mM phosphate buffer (pH 6.5). The Amplex Red probe was  
 18 used to detect total H<sub>2</sub>O<sub>2</sub> content. Data are shown as means ± SEM (*n* = 4). C, Chronological  
 19 changes of superoxide dismutase (SOD) activity in leaves of rice in response to PXO99<sup>A</sup>.  
 20 Data are shown as means ± SEM (*n* = 4). D, Relative expression of H<sub>2</sub>O<sub>2</sub>-related genes after  
 21 PXO99<sup>A</sup> inoculation. Data are shown as means ± SEM (*n* = 3). DPI, diphenylene iodonium.  
 22 Lowercase letters indicate significant differences at *P* ≤ 0.01 followed Duncan's multiple  
 23 range tests and one-way ANOVA. These experiments were performed at least twice with  
 24 similar results.



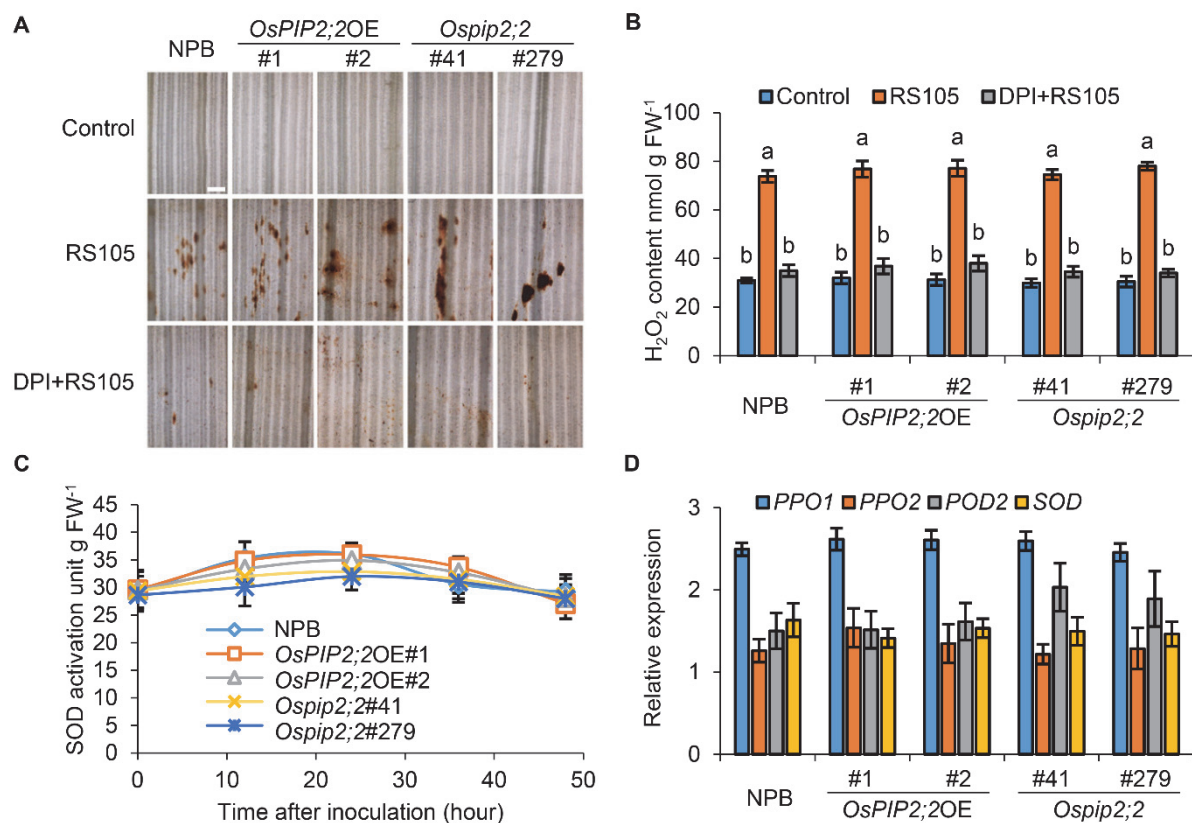

25

26 **Figure S7. Analysis of the H<sub>2</sub>O<sub>2</sub> content in rice after infection with RS105.** A, 3,3-  
 27 diaminobenzidine (DAB) staining of H<sub>2</sub>O<sub>2</sub> production in rice at 24 h after inoculation with  
 28 RS105. Scale bar = 50  $\mu$ m, applying to all the images. B, H<sub>2</sub>O<sub>2</sub> content in rice 8 h post  
 29 inoculation with RS105, Amplex Red was used to detect total H<sub>2</sub>O<sub>2</sub> in leaves of rice. Data  
 30 are shown as means  $\pm$  SEM ( $n = 4$ ). C, Chronological changes of superoxide dismutase  
 31 (SOD) activity in leaves of rice in response to RS105. Data are shown as means  $\pm$  SEM ( $n =$   
 32 4). D, Relative expression of H<sub>2</sub>O<sub>2</sub>-related genes after inoculation with RS105. Data are  
 33 shown as means  $\pm$  SEM ( $n = 3$ ). DPI, diphenylene iodonium. Lowercase letters indicate  
 34 significant differences at  $P \leq 0.01$  followed Duncan's multiple range tests and one-way  
 35 ANOVA. These experiments were performed at least twice with similar results.

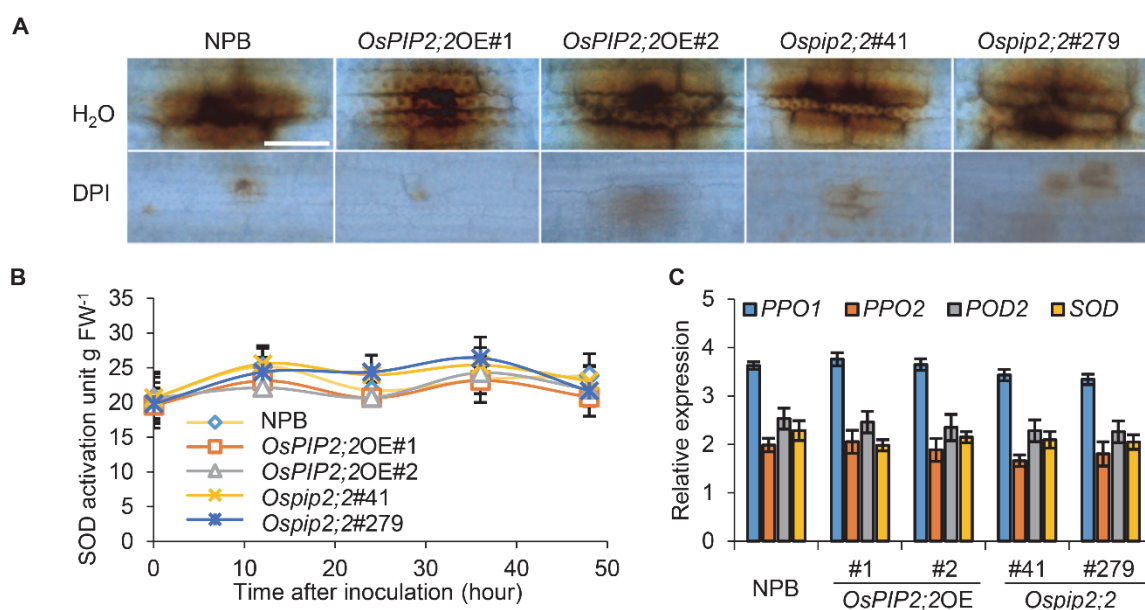

36

37 **Figure S8. Analysis of the H<sub>2</sub>O<sub>2</sub> content in rice after infection with HB3.** A, 3,3-  
 38 diaminobenzidine (DAB) staining of H<sub>2</sub>O<sub>2</sub> production in rice at 24 h after infection with  
 39 HB3. Scale bar = 50 μm, applying to all the images. B, Chronological changes of superoxide  
 40 dismutase (SOD) activity in leaves of rice in response to HB3. Data are shown as means ±  
 41 SEM (*n* = 4). C, Relative expression of H<sub>2</sub>O<sub>2</sub>-related genes after inoculation with HB3. Data  
 42 are shown as means ± SEM (*n* = 3). DPI, diphenylene iodonium. These experiments were  
 43 performed at least twice with similar results.



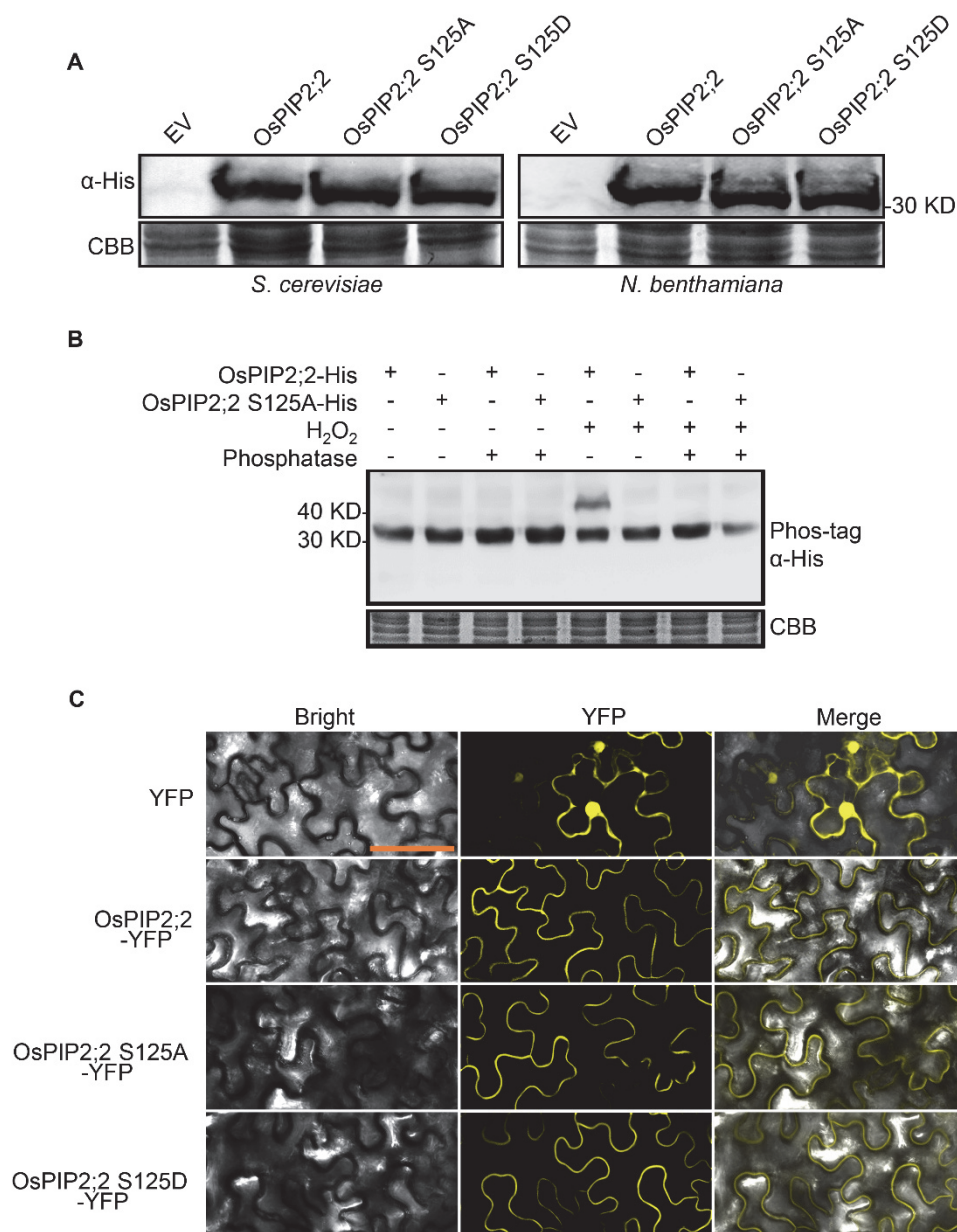

48

49 **Figure S10. Phosphorylation of OsPIP2;2 at S125 does not change its expression level.**

50 A, Western blot analyzed OsPIP2;2 and its mutant expression in yeast (left) and tobacco

51 (right). Empty vector (EV) was used as negative control.  $\alpha$ -His, anti-His antibody. coomassie

52 brilliant blue (CBB) was used to show loading protein (bottom panel). B, Immunoblotting

53 detection of phosphorylation of OsPIP2;2 at S125 induced by H<sub>2</sub>O<sub>2</sub> after Phos-tag gel

54 separation. Phospho-proteins can be dephosphorylated by phosphatase. Protein samples

55 treated with (+) or without (-) calf intestinal alkaline phosphatase were separated by Phos-tag

56 gels. The yeast cells were treated with 300  $\mu$ M H<sub>2</sub>O<sub>2</sub> for 30 min. S125A, phosphodeficient

---

57 mutant of OsPIP2;2; S125D, phosphomimetic mutant of OsPIP2;2, coomassie brilliant blue  
58 (CBB) was used to show loading protein (bottom panel). These experiments were performed  
59 at least twice with similar results. C, Subcellular localization of OsPIP2;2 and its mutants in  
60 *N. benthamiana* (Figure 4F duplicate placed here to show correlations of the responses with  
61 each other). Scale bar = 50  $\mu$ m, applying to all the images. S125A, phosphodeficient mutant  
62 of OsPIP2;2; S125D, phosphomimetic mutant of OsPIP2;2.

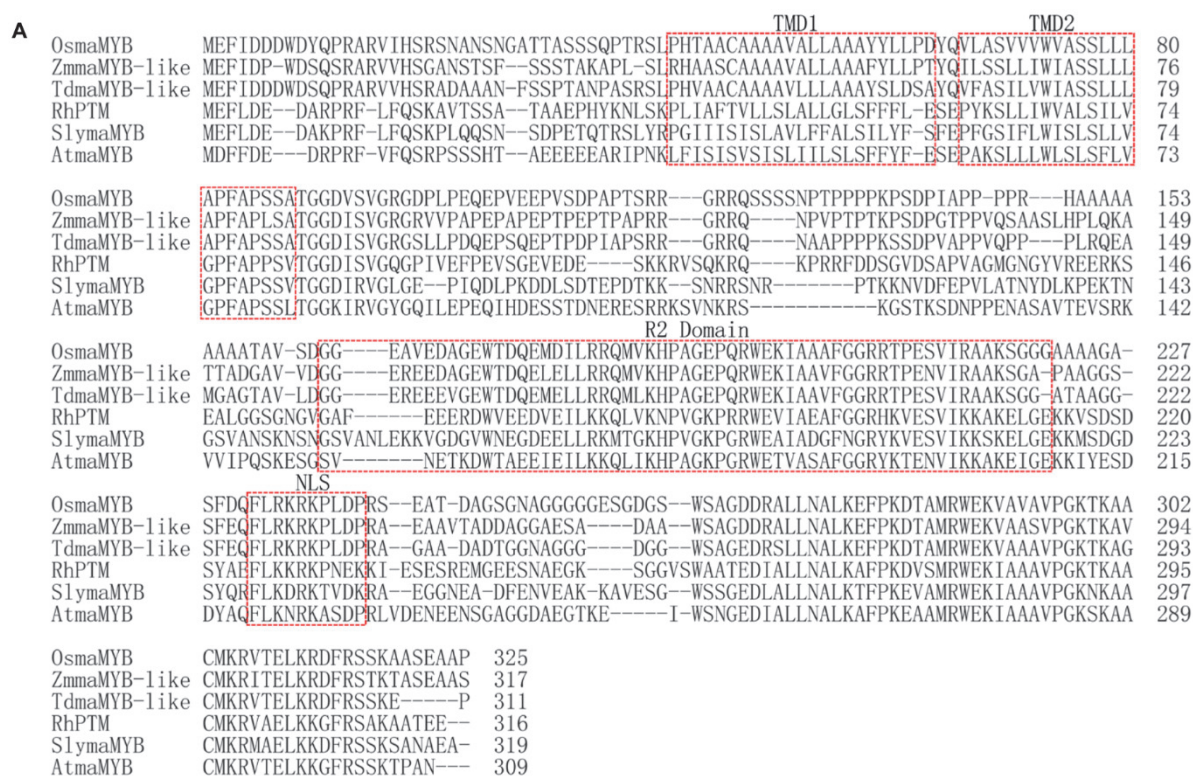

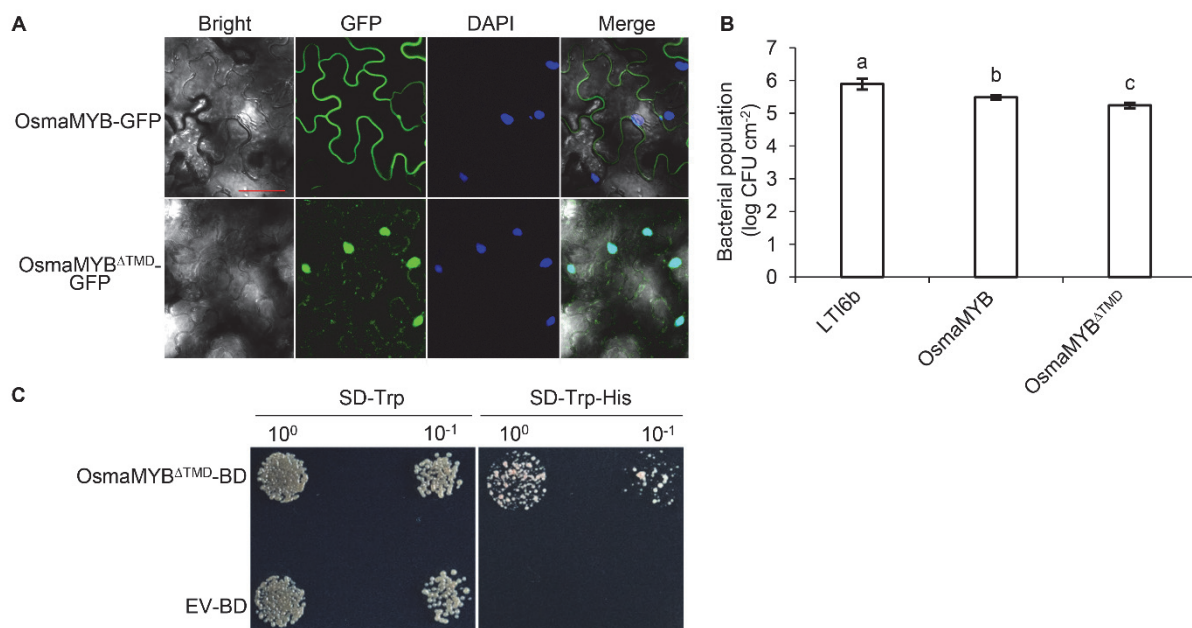

70

71 **Figure S12. Promotion of plant resistance by OsmaMYB C terminus.** A, Subcellular  
 72 localization of OsmaMYB and OsmaMYB<sup>ΔTMD</sup> in *N. benthamiana*. GFP, green-fluorescent  
 73 protein. DAPI, 4,6-diamidino-2-phenylindole, a nuclear staining dye. To provide  
 74 fluorescence-undetectable background, GFP and DAPI fluorescence signals were captured  
 75 under lasers intensity settings as 2% and 6%, respectively. Scale bar = 50 μm, applying to all  
 76 the images. B, Titers of DC3000 ΔhopQ1-1 3 days post-inoculation. *A. tumefaciens* was used  
 77 to transiently express OsmaMYB and OsmaMYB<sup>ΔTMD</sup> on one-half of an *N. benthamiana* leaf  
 78 and LTI6b control on the other. Data are shown as means ± SEM ( $n = 6$ ). ΔTMD, deletion of  
 79 the transmembrane domain (TMD). Lowercase letters indicate significant differences at  $P \leq$   
 80 0.01 followed Duncan's multiple range tests and one-way ANOVA. C, Transactivation  
 81 activity assay of OsmaMYB in yeast. BD, GAL4 DNA-binding domain; ΔTMD, deletion of  
 82 the transmembrane domain. Empty vector (EV) served as a negative control. These  
 83 experiments were performed at least twice with similar results.

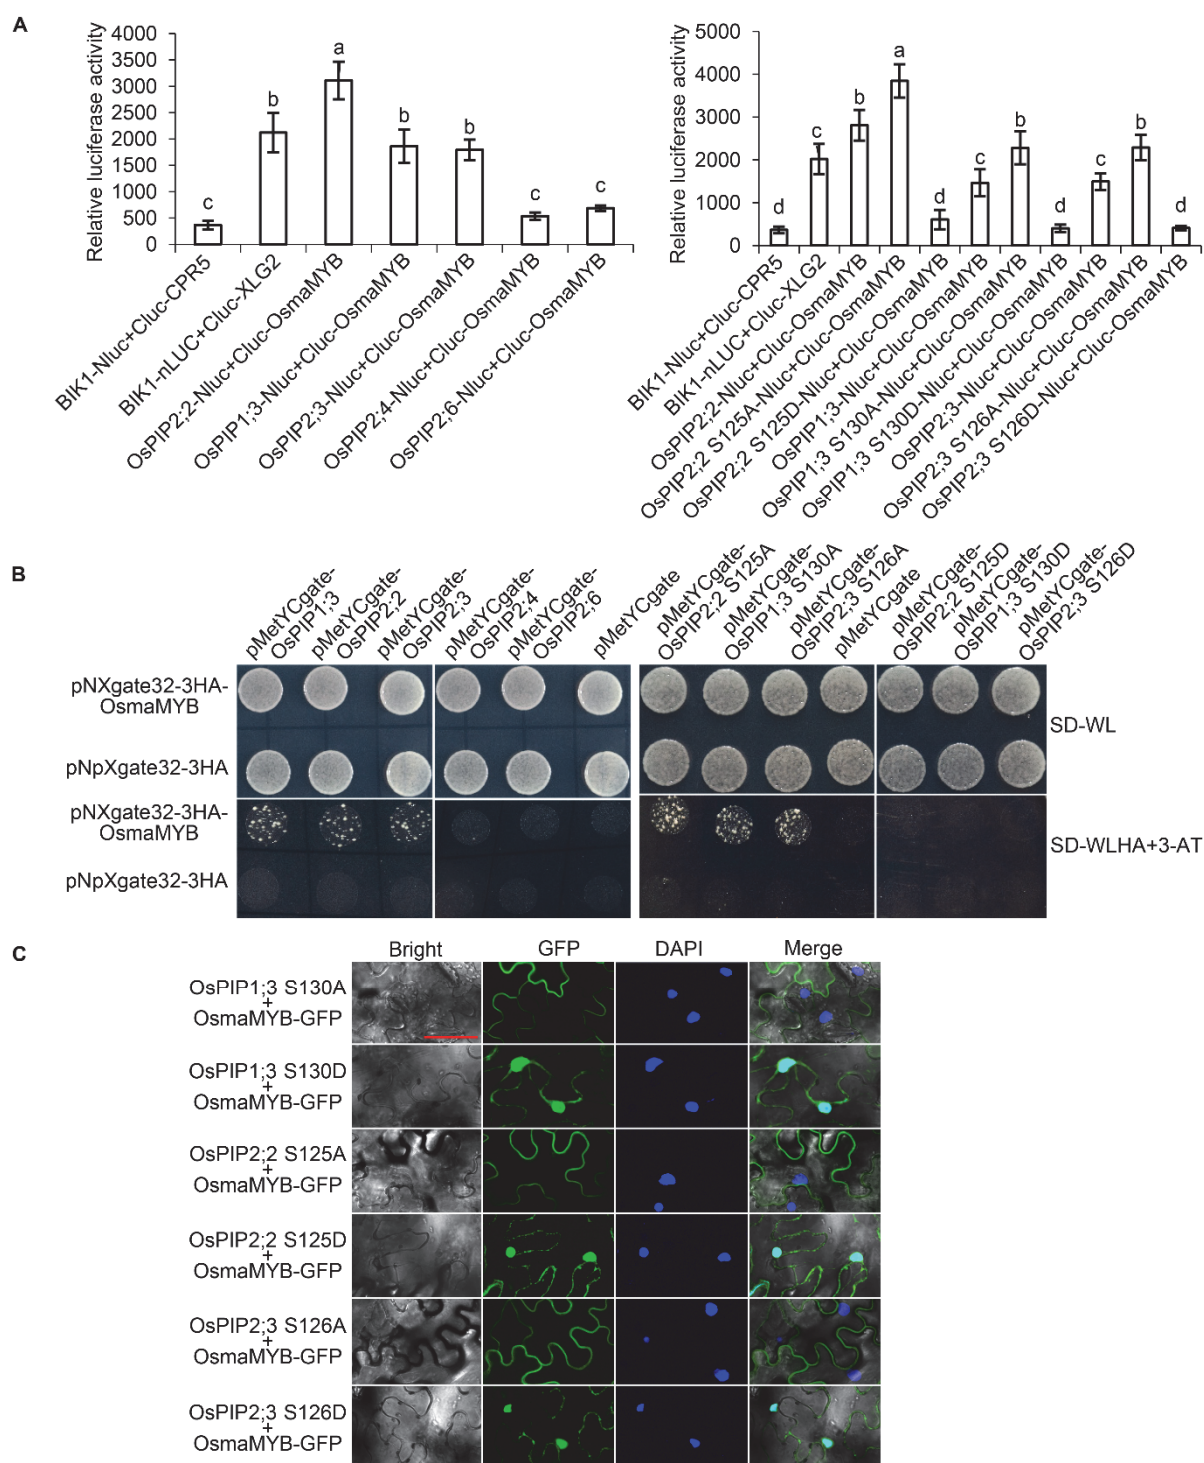

84

85 **Figure S13. Association between OsmaMYB and OsPIPs.** A, Association of OsPIP1;3,  
 86 OsPIP2;2, OsPIP2;3 or their mutants with OsmaMYB indicated by the split-luciferase  
 87 complementation assay. The indicated constructs were co-expressed in *N. benthamiana*  
 88 leaves and then luciferase activities were examined. Cluc-CPR5 and BIK1-Nluc were used as  
 89 negative control, and Cluc-XLG2 and BIK1-Nluc were used as positive control. Data are  
 90 shown as means  $\pm$  SEM ( $n = 8$ ). Lowercase letters indicate significant differences at  $P \leq 0.01$



---

91 followed Duncan's multiple range tests and one-way ANOVA. B, Association of OsPIP1;3,  
92 OsPIP2;2, OsPIP2;3 or their mutants with OsmaMYB in the split-ubiquitin yeast two-hybrid  
93 system. Yeast cells co-transformed with bait and prey vectors were grown on SD-Trp-Leu-  
94 His-Ade (SD-WLHA) medium supplemented with 10 mM of 3-amino-1,2,4-triazole (3-AT).  
95 C, Subcellular localization of OsmaMYB-GFP after co-expression with phosphorylation  
96 mutants of OsPIP1;3, OsPIP2;2, or OsPIP2;3 in *N. benthamiana*. To provide fluorescence-  
97 undetectable background, GFP and DAPI fluorescence signals were captured under lasers  
98 intensity settings as 2% and 6%, respectively. To provide fluorescence-undetectable  
99 background, GFP and DAPI fluorescence signals were captured under lasers intensity settings  
100 as 2% and 6%, respectively. S130A, phosphonull mutant of OsPIP1;3. S130D,  
101 phosphomimetic mutant of OsPIP1;3. S126A, phosphonull mutant of OsPIP2;3. S126D,  
102 phosphomimetic mutant of OsPIP2;3. GFP, green-fluorescent protein. DAPI, 4,6-diamidino-  
103 2-phenylindole, a nuclear staining dye. Scale bar = 50  $\mu$ m, applying to all the images.

104 **Table S1.** List of primers used in this study.

| Name                | Gen ID             | Primer sequence (5' to 3') |
|---------------------|--------------------|----------------------------|
| Primers for qRT-PCR |                    |                            |
| qPIP1;1-F           | LOC_Os02<br>g44630 | CGCAATCGTGATGTCCTGTT       |
| qPIP1;1-R           |                    | CACGATTGAGTTGTTCAGGGTT     |
| qPIP1;2-F           | LOC_Os04<br>g47220 | GCTCCGACGACAAGGACTAC       |
| qPIP1;2-R           |                    | AGGAAGGTGGCCATGAACTC       |
| qPIP1;3-F           | LOC_Os02<br>g57720 | ACCGTCTGGTGATCGATGAAG      |
| qPIP1;3-R           |                    | TCCGCACACACAAGTACCAT       |
| qPIP2;1-F           | LOC_Os07<br>g26690 | GCAGCCATTGTTGGGGGATA       |
| qPIP2;1-R           |                    | GCTGCTGAAACAAAACGACCA      |
| qPIP2;2-F           | LOC_Os02<br>g41860 | TGCATTTGCCTCGTGGATA        |
| qPIP2;2-R           |                    | CAAACCTGGAAGCACCAGCG       |
| qPIP2;3-F           | LOC_Os04<br>g44060 | AGCTGACCAAGTGGTCCCTG       |
| qPIP2;3-R           |                    | GACTGGTGCTTGTACCCGAT       |
| qPIP2;4-F           | LOC_Os07<br>g26630 | ACAGAGCACCTGTTTCGTCAG      |
| qPIP2;4-R           |                    | AGACAACAGAGGGACAGAGTTT     |
| qPIP2;5-F           | LOC_Os07<br>g26660 | CCGTGTTTCATGGTGCACCT       |
| qPIP2;5-R           |                    | CCGGGTTGATGCCGGT           |
| qPIP2;6-F           | LOC_Os04<br>g16450 | GCGGCGTATCACCAGTACA        |
| qPIP2;6-R           |                    | ATGACCAAGTCCAACCAGGC       |
| qPIP2;7-F           | LOC_Os09<br>g36930 | GTGTGCGTATGTTGTCTGG        |
| qPIP2;7-R           |                    | GAATGGCGATCGCATGCATTA      |
| qPIP2;8-F           | LOC_Os03<br>g64330 | CTGTTGGTGTGCATCAGTGT       |
| qPIP2;8-R           |                    | GCAGTACACCAGCACGAAGAT      |
| qActin1-F           | Os05g0438<br>800   | TGAAGATCAAGGTGGTCCG        |
| qActin1-R           |                    | CACAATGGATGGGCCAGACT       |
| qPPO1-F             | LOC433705<br>5     | TATGCGACTTGTGGACGAC        |
| qPPO1-R             |                    | ACTTAGCGTAGCCGATGCTG       |
| qPPO2-F             | LOC432412          | CTCAAGTGCCAGTTAGGCCA       |

|                                                                                             |                    |                                                   |
|---------------------------------------------------------------------------------------------|--------------------|---------------------------------------------------|
| qPPO2-R                                                                                     |                    | ATTCGCATCACACACGCAAC                              |
| qPOD1-F                                                                                     | LOC432696<br>9     | TTCCACGACTGCTTCGTCAG                              |
| qPOD1-R                                                                                     |                    | GGCGTCGATCACCTCGAAA                               |
| qSOD-F                                                                                      | LOC434009<br>1     | GATAGATAGCGCGGCAGAGG                              |
| qSOD-R                                                                                      |                    | GCGGAGTAGTGAGAGCGTAG                              |
| qPR1a-F                                                                                     | LOC434231<br>7     | CGTGTCGGCGTGGGTGT                                 |
| qPR1a-R                                                                                     |                    | GGCGAGTAGTTGCAGGTGATG                             |
| qPR10-F                                                                                     | LOC_Os03<br>g18850 | CCATGAAGCTTAACCCCGATG                             |
| qPR10-R                                                                                     |                    | AGCTTGCCACCTTGCTTT                                |
| qPot2-F                                                                                     | MGG_0585<br>0      | ACGACCCGTCTTACTTATTTGG                            |
| qPot2-R                                                                                     |                    | AAGTAGCGTTGGTTTTGTTGGAT                           |
| Primers for over-expression constructs to H <sub>2</sub> O <sub>2</sub> translocation assay |                    |                                                   |
| PIP1;1-BamH I -F                                                                            |                    | GGGATCCATGGAGGGGAAGGAGGAGGAC                      |
| PIP1;1-Xba I-R                                                                              |                    | GCTCTAGAAGACCTGCTCTTGAATGGGATC                    |
| PIP1;2-BamH I-F                                                                             |                    | GGGATCCCATGGAGGGGAAGGAGGAGG                       |
| PIP1;2-Xba I-R                                                                              |                    | GCTCTAGACGACCTGCTCTTGAATGGAATT                    |
| PIP1;3-BamH I-F                                                                             |                    | GGGATCCATGGAGGGGAAGGAGGAGGATG                     |
| PIP1;3-Xba I-R                                                                              |                    | GCTCTAGAGTCCCGGCTCTTGAAGGGGA                      |
| PIP2;1-BamH I-F                                                                             |                    | GGGATCCATGGGGAAGGACGAGGTGATG                      |
| PIP2;1-Xba I-R                                                                              |                    | GCTCTAGACGCGTTGCTCCTGAAGGAGC                      |
| PIP2;2-BamH I-F                                                                             |                    | GGGATCCATGGCGAAAGACATTGGGTCCG                     |
| PIP2;2-Xba I-R                                                                              |                    | GCTCTAGAGGCGTTGCTCCGGTAGGAC                       |
| PIP2;3-BamH I-F                                                                             |                    | GGGATCCATGGCGAAGGACATTGAGGC                       |
| PIP2;3-Xba I-R                                                                              |                    | GCTCTAGAGCCGCGGAAGGAGGAGGAAGA                     |
| PIP2;4-BamH I-F                                                                             |                    | GGGATCCATGGGCAAAGAGGTGGACGT                       |
| PIP2;4-Xba I-R                                                                              |                    | GCTCTAGACGCGTTGCTCCGGAAGGAG                       |
| PIP2;5-BamH I-F                                                                             |                    | GGGATCCATGGGCAAAGAGGCCGACGTC                      |
| PIP2;5-Xba I-R                                                                              |                    | GCTCTAGAAGCATTGCTCCGGAAGGAG                       |
| PIP2;6-BamH I-F                                                                             |                    | GGGATCCATGTCGAAGGAGGTGAGCGAG                      |
| PIP2;6-Xba I-R                                                                              |                    | GCTCTAGAGTTGCTGGGGTTGCTCCGGAA                     |
| PIP2;7-BamH I-F                                                                             |                    | GGGATCCATGGCGTCAAGGAGGAGGT                        |
| PIP2;7-Xba I-R                                                                              |                    | GCTCTAGACGCCGTCACGCTGGTGC                         |
| PIP2;8-BamH I-F                                                                             |                    | GGGATCCATGGCTGCAGGCAGCGGCA                        |
| PIP2;8-Xba I-R                                                                              |                    | GCTCTAGAAAAATGGGGTGATCGGTAGGAGG                   |
| Primers for PIPs mutation (overlap-PCR)                                                     |                    |                                                   |
| PIP1;3 S130A-mutation-F                                                                     |                    | ATTAAGCTTGGTACCGAGCTCATGGAGGGGAAGGAGG<br>AGGATGTG |
| PIP1;3 S130A-mutation-                                                                      |                    | AACACCGCCCGCTCAGCGCCAGCTTCCGCGCCA                 |

|                                                         |  |                                                        |
|---------------------------------------------------------|--|--------------------------------------------------------|
| R                                                       |  |                                                        |
| <i>PIP1;3 S130A</i> -mutation-F                         |  | TGGCGCGGAAGCTGGCGCTGACGCGGGCGGTGTT                     |
| <i>PIP1;3 S130A</i> -mutation-R                         |  | TGATGGATATCTGCAGAATTC<br>GATTAGTCCCGGCTCTTGAAGGGGAT    |
| <i>PIP1;3 S130D</i> -mutation-F                         |  | ATTAAGCTTGGTACCGAGCTCATGGAGGGGAAGGAGG<br>AGGATGTG      |
| <i>PIP1;3 S130D</i> -mutation-R                         |  | AACACCGCCCGCGTCAGGTCCAGCTTCCGCGCCA                     |
| <i>PIP1;3 S130D</i> -mutation-F                         |  | TGGCGCGGAAGCTGGACCTGACGCGGGCGGTGTT                     |
| <i>PIP1;3 S130D</i> -mutation-R                         |  | TGATGGATATCTGCAGAATTC<br>GATTAGTCCCGGCTCTTGAAGGGGAT    |
| <i>PIP2;2 S125A</i> -mutation-F                         |  | ATTAAGCTTGGTACCGAGCTCATGGCGAAAGACATTGAG<br>GCGTCGGCGCC |
| <i>PIP2;2 S125A</i> -mutation-R                         |  | CCGCCCTGATCAGCGCCACCTTCCTCGCC                          |
| <i>PIP2;2 S125A</i> -mutation-F                         |  | GGCGAGGAAGGTGGCGCTGATCAGGGCGG                          |
| <i>PIP2;2 S125A</i> -mutation-R                         |  | TGATGGATATCTGCAGAATTCGCGGTTGCTCCGGTAGGA<br>CCCGAGCTTGG |
| <i>PIP2;2 S125D</i> -mutation-F                         |  | ATTAAGCTTGGTACCGAGCTCATGGCGAAAGACATTGAG<br>GCGTCGGCGCC |
| <i>PIP2;2 S125D</i> -mutation-R                         |  | CCGCCCTGATCAGGTCCACCTTCCTCGCC                          |
| <i>PIP2;2 S125D</i> -mutation-F                         |  | GGCGAGGAAGGTGGACCTGATCAGGGCGG                          |
| <i>PIP2;2 S125D</i> -mutation-R                         |  | TGATGGATATCTGCAGAATTC<br>GGCGTTGCTCCGGTAGGACCCGAGCTTGG |
| <i>PIP2;3 S126A</i> -mutation-F                         |  | ATTAAGCTTGGTACCGAGCTCATGGCGAAGGACATTGAG<br>GCGGCGGCGG  |
| <i>PIP2;3 S126A</i> -mutation-R                         |  | GCGCGCACCAAGCGCCACCTTGCGCGC                            |
| <i>PIP2;3 S126A</i> -mutation-F                         |  | GCGCGCAAGGTGGCGCTGGTGCGCGC                             |
| <i>PIP2;3 S126A</i> -mutation-R                         |  | TGATGGATATCTGCAGAATTCGCCGCGGAAGGAGGAGG<br>AAGAGCCGAGC  |
| <i>PIP2;3 S126D</i> -mutation-F                         |  | ATTAAGCTTGGTACCGAGCTCATGGCGAAGGACATTGAG<br>GCGGCGGCGG  |
| <i>PIP2;3 S126D</i> -mutation-R                         |  | GCGCGCACCAAGCGTCACCTTGCGCGC                            |
| <i>PIP2;3 S126D</i> -mutation-F                         |  | GCGCGCAAGGTGACGCTGGTGCGCGC                             |
| <i>PIP2;3 S126D</i> -mutation-R                         |  | TGATGGATATCTGCAGAATTCGCCGCGGAAGGAGGAGG<br>AAGAGCCGAGC  |
| Primers for yeast two-hybrid (homologous recombination) |  |                                                        |

|                                                           |                |                                                                                                |
|-----------------------------------------------------------|----------------|------------------------------------------------------------------------------------------------|
| <i>PIP1;3/PIP1;3</i><br><i>S130A/PIP1;3 S130D-F</i>       |                | ACAAGTTTGTACAAAAAAGCAGGCTCTCCAACCACCAT<br>GGAGGGGAAGGAGGAGGATGTG                               |
| <i>PIP1;3/PIP1;3</i><br><i>S130A/PIP1;3 S130D-R</i>       |                | TCCGCCACCACCAACCACTTTGTACAAGAAAGCTGGGT<br>AGTCCCGGCTCTTGAAGGGGAT                               |
| <i>PIP2;2/PIP2;2</i><br><i>S125A/PIP2;2 S125D-F</i>       |                | ACAAGTTTGTACAAAAAAGCAGGCTCTCCAACCACCAT<br>GGCGAAAGACATTGAGGCGTC                                |
| <i>PIP2;2/PIP2;2</i><br><i>S125A/PIP2;2 S125D-R</i>       |                | TCCGCCACCACCAACCACTTTGTACAAGAAAGCTGGGT<br>AGGCGTTGCTCCGGTAGGACC                                |
| <i>maMYB-F</i>                                            | LOC434471<br>1 | ACAAGTTTGTACAAAAAAGCAGGCTCTCCAACCACCAT<br>GGAGTTCATCGACGACGACTG                                |
| <i>maMYB-R</i>                                            |                | TCCGCCACCACCAACCACTTTGTACAAGAAAGCTGGGT<br>ATGGAGCTGCCTCCGATGCTG                                |
| <i>PIP2;3/PIP2;3</i><br><i>S126A/PIP2;3 S126D-F</i>       |                | ACAAGTTTGTACAAAAAAGCAGGCTCTCCAACCACCAT<br>GGCGAAGGACATTGAGGCG                                  |
| <i>PIP2;3/PIP2;3</i><br><i>S126A/PIP2;3 S126D-R</i>       |                | TCCGCCACCACCAACCACTTTGTACAAGAAAGCTGGGT<br>AGCCGCGGAAGGAGGAGGAAGA                               |
| <i>PIP2;4-F</i>                                           |                | ACAAGTTTGTACAAAAAAGCAGGCTCTCCAACCACCAT<br>GGGCAAAGAGGTGGACGT                                   |
| <i>PIP2;4-R</i>                                           |                | TCCGCCACCACCAACCACTTTGTACAAGAAAGCTGGGT<br>ACTACGCGTTGCTCCGGA                                   |
| <i>PIP2;6-F</i>                                           |                | ACAAGTTTGTACAAAAAAGCAGGCTCTCCAACCACCAT<br>GTCGAAGGAGGTGAGCGA                                   |
| <i>PIP2;6-R</i>                                           |                | TCCGCCACCACCAACCACTTTGTACAAGAAAGCTGGGT<br>AGTTGCTGGGGTTGCTCC                                   |
| Primers for co-IP                                         |                |                                                                                                |
| <i>PIP2;2-Kpn I-F</i>                                     |                | GGTACCCATCATCACCATCACCATATGGCGAAAGACATT<br>GAGGCGTC                                            |
| <i>PIP2;2-Xba I-R</i>                                     |                | TCTAGAGGCGTTGCTCCGGTAGGACC                                                                     |
| <i>maMYB-Kpn I-F</i>                                      |                | GGTACCATGGAGTTCATCGACGACGACTG                                                                  |
| <i>maMYB-Xba I-R</i>                                      |                | CTTGTCATCGTCATCCTTGTAGTCGATGTCATGATCTTTAT<br>AATCACCGTCATGGTCTTTGTAGTCTGGAGCTGCCTCCG<br>ATGCTG |
| Primers for Split-luciferase complementation assays       |                |                                                                                                |
| <i>PIP1;3/PIP1;3</i><br><i>S130A/PIP1;3 S130D-Kpn I-F</i> |                | GGTACCATGGAGGGGAAGGAGGAGGATGTG                                                                 |
| <i>PIP1;3/PIP1;3</i><br><i>S130A/PIP1;3 S130D-Sac I-R</i> |                | GTCGACTAGTCCCGGCTCTTGAAGGGGAT                                                                  |
| <i>PIP2;2/PIP2;2 S125A/PIP2;2 S125D-Kpn I-F</i>           |                | GGTACCATGGCGAAAGACATTGAGGCGTC                                                                  |
| <i>PIP2;2/PIP2;2 S125A/PIP2;2 S125D-Sac I-R</i>           |                | GTCGACGCGGTTGCTCCGGTAGGACC                                                                     |

|                                                                      |  |                                                       |
|----------------------------------------------------------------------|--|-------------------------------------------------------|
| <i>PIP2;3/PIP2;3</i><br><i>S126A/PIP2;3 S126D-</i><br><i>Kpn I-F</i> |  | GGTACCATGGCGAAGGACATTGAGGCG                           |
| <i>PIP2;3/PIP2;3</i><br><i>S126A/PIP2;3 S126D-Sac</i><br><i>I-R</i>  |  | GTCGACGCCGCGGAAGGAGGAGGAAGA                           |
| <i>maMYB-Kpn I-F</i>                                                 |  | GGTACCATGGAGTTCATCGACGACGACTG                         |
| <i>maMYB-Sac I-R</i>                                                 |  | GTCGACTGGAGCTGCCTCCGATGCTG                            |
| <i>PIP2;4-Kpn I-F</i>                                                |  | GGTACCATGGGCAAAGAGGTGGACGT                            |
| <i>PIP2;4-Sac I-R</i>                                                |  | GTCGACCTACGCGTTGCTCCGGA                               |
| <i>PIP2;6-Kpn I-F</i>                                                |  | GGTACCATGTCTGAAGGAGGTGAGCGA                           |
| <i>PIP2;6-Sac I-R</i>                                                |  | GTCGACGTTGCTGGGGTTGCTCC                               |
| Primers for subcellular localization construct                       |  |                                                       |
| <i>PIP2;2/PIP2;2 S125A/</i><br><i>PIP2;2 S125D-Kpn I-F</i>           |  | GGTACCATGGCGAAAGACATTGAGGCGTC                         |
| <i>PIP2;2/PIP2;2 S125A/</i><br><i>PIP2;2 S125D-Xba I-R</i>           |  | TCTAGATCTAGAGGCGTTGCTCCGGTAGGACC                      |
| <i>maMYB-Kpn I-F</i>                                                 |  | GGTACCATGGAGTTCATCGACGACGACTG                         |
| <i>maMYB-Xba I-R</i>                                                 |  | TCTAGATGGAGCTGCCTCCGATGCTG                            |
| homologous recombination                                             |  |                                                       |
| <i>maMYB<sup>ΔTMD</sup>-F</i>                                        |  | GCTTTCGCGAGCTCGGTACCATGACCGGCGGGCAGCTC<br>TC          |
| <i>maMYB<sup>ΔTMD</sup>-R</i>                                        |  | CTAGAGGATCCCCGGGTACCTGGAGCTGCCTCCGATGC                |
| Transactivation assay (homologous recombination)                     |  |                                                       |
| <i>maMYB<sup>ΔTMD</sup>-F</i>                                        |  | TGGCCATGGAGGCCGAATTCACCGGCGGGCAGCTCTC                 |
| <i>maMYB<sup>ΔTMD</sup>-R</i>                                        |  | CGACGGATCCCCGGAATCTGGAGCTGCCTCCGATGC                  |
| Primers for transgenic plants                                        |  |                                                       |
| <i>pip2;2-F (mutation)</i>                                           |  | GTGTGGCGAAAGACATTGAGGCGT/GTGTGCTGTACCGC<br>GCGGTGATCG |
| <i>pip2;2-R (mutation)</i>                                           |  | AAACACGCCTCAATGTCTTTCGCC/AAACCGATCACCGC<br>GCGGTACAGC |
| <i>35S:PIP2;2-BamH I-F</i>                                           |  | GGATCCATGGCGAAAGACATTGAGGCGTC                         |
| <i>35S:PIP2;2-Hind III-R</i>                                         |  | ATGGTGATGGTGATGATGAAGCTTGGCGTTGCTCCGGTA<br>GGACC      |
| Primers for detection transgenic plants                              |  |                                                       |
| <i>pip2;2-F</i>                                                      |  | TGAGGCTAAGTCGGTTGTGG                                  |
| <i>pip2;2-R</i>                                                      |  | ATTTGGGACCTGAGATGCCG                                  |
| <i>PIP2;2-F</i>                                                      |  | TTCATTGGAGAGAACACGGGGGAC                              |
| <i>PIP2;2-R</i>                                                      |  | CTCTGGAACCCCTTGACGAGCC                                |
